# Supplementary material for: FOXO4 and FOXD3 are predictive of prognosis in gastric carcinoma patients
Source: PubMed Central journal article supplement (PMC5041928; doi:10.18632/oncotarget.8339), 2016-03-24
Supplement: oncotarget-07-25585-s001.pdf [file oncotarget-07-25585-s001.pdf]

## FOXO4 and FOXD3 are predictive of prognosis in gastric carcinoma patients

### Supplementary Materials

**Supplementary Table S1: Comparison of baseline clinical characteristics based on FOXO4 and FOXD3 mRNA expression levels**

| Variable                | FOXO4                     |            |           | FOXD3     |           |            |
|-------------------------|---------------------------|------------|-----------|-----------|-----------|------------|
|                         | Low (%)                   | High (%)   | <i>P</i>  | Low       | High      | <i>P</i>   |
| Sex                     |                           |            | 0.183     |           |           | 0.790      |
|                         | male                      | 53 (46.9)  | 63 (55.8) | 57 (50.4) | 59 (52.2) |            |
|                         | female                    | 60 (53.1)  | 50 (44.2) | 56 (49.6) | 54 (47.8) |            |
| Age                     |                           |            | 0.903     |           |           | 0.428      |
|                         | ≥ 60                      | 59 (52.2)  | 63 (55.8) | 56 (49.6) | 66 (58.4) |            |
|                         | < 60                      | 54 (48.8)  | 50 (44.2) | 57 (50.4) | 47 (41.6) |            |
| Primary site            |                           |            | 0.925     |           |           | 0.706      |
|                         | Antrum/Distal             | 43 (38.1)  | 41 (36.3) | 42 (37.2) | 42 (37.2) |            |
|                         | Cardia/Proximal           | 29 (34.5)  | 38 (33.6) | 40 (35.4) | 37 (32.7) |            |
|                         | Fundus/Body               | 20 (17.7)  | 24 (21.2) | 23 (20.4) | 21 (18.6) |            |
|                         | Gastroesophageal Junction | 11 (9.7)   | 10 (8.8)  | 8 (7.1)   | 13 (11.5) |            |
| Grade                   |                           |            | 0.095*    |           |           | 0.549*     |
|                         | G1/G2                     | 40 (35.4)  | 56 (49.6) | 50 (44.2) | 46 (40.7) |            |
|                         | G3                        | 71 (62.8)  | 55 (48.7) | 62 (54.9) | 64 (56.6) |            |
|                         | Gx                        | 2 (1.8)    | 2 (1.8)   | 1 (0.9)   | 3 (2.7)   |            |
| T stage                 |                           |            |           |           |           | 0.043      |
|                         | T1/T2                     | 6 (5.3)    | 29 (25.7) | < 0.001   | 23 (20.4) | 12 (10.6)  |
|                         | T3/T4                     | 107 (94.7) | 84 (74.3) |           | 90 (79.6) | 101 (89.4) |
| N stage                 |                           |            | 0.027     |           |           | 0.152      |
|                         | N0                        | 24 (21.2)  | 38 (33.6) |           | 34 (30.1) | 28 (24.8)  |
|                         | N1                        | 27 (23.9)  | 23 (20.4) |           | 28 (24.8) | 22 (19.5)  |
|                         | N2                        | 33 (29.2)  | 17 (15.0) |           | 18 (15.9) | 32 (28.3)  |
|                         | N3                        | 29 (25.7)  | 35 (31.0) |           | 33 (29.2) | 31 (27.4)  |
| Lymphovascular invasion |                           |            | 0.881     |           |           | 0.653      |
|                         | Negative                  | 83 (73.5)  | 82 (72.6) |           | 81 (71.7) | 84 (74.3)  |
|                         | Positive                  | 30 (26.5)  | 31 (27.4) |           | 32 (28.3) | 29 (25.7)  |
| Perineural invasion     |                           |            | 0.413     |           |           | 0.251      |
|                         | Negative                  | 87 (77.0)  | 92 (81.4) |           | 93 (82.3) | 86 (76.1)  |
|                         | Positive                  | 26 (23.0)  | 21 (18.6) |           | 20 (17.7) | 27 (23.9)  |

\*Fisher's exact test.

**Supplementary Table S2: The primers for RT-PCR analysis**

| primers | Sequences (5'to3')      |
|---------|-------------------------|
| FOXO4F  | CCGGCAAAGCTCTTGGTG      |
| FOXO4R  | GGTCCACATATCGGCTTCTTCA  |
| FOXD3F  | ATTCTTAGCGTGCCACTCTCCGG |
| FOXD3R  | CTGGAGGTGCATTTGTTGCTCGA |
| FOXS1F  | AGTGGCATCTACCGCTACATC   |
| FOXS1R  | CACCTTGACAAAGCACTCGT    |
| actinF  | CTACGTCGCCCTGGACTTCGAGC |
| actinR  | GATGGAGCCGCCGATCCACACGG |
